# Supplementary material for: Development and Validation of a Machine Learning-Based Prediction Model for Thrombocytopenia Following Cardiopulmonary Bypass
Source: Research Square preprint supplement (doi:10.21203/rs.3.rs-6121152/v1), 2025-05-06

Table S1 Transparent Reporting of a multivariable prediction model for Individual Prognosis or Diagnosis Statement

| **Section/Topic** | **Item** |  | **Checklist Item** | **Page** |
| --- | --- | --- | --- | --- |
| **Title and abstract** | | | | |
| Title | 1 | D;V | Identify the study as developing and/or validating a multivariable prediction model, the target population, and the outcome to be predicted. | Title |
| Abstract | 2 | D;V | Provide a summary of objectives, study design, setting, participants, sample size, predictors, outcome, statistical analysis, results, and conclusions. | Abstract |
| **Introduction** | | | | |
| Background and objectives | 3a | D;V | Explain the medical context (including whether diagnostic or prognostic) and rationale for developing or validating the multivariable prediction model, including references to existing models. | Introduction |
| 3b | D;V | Specify the objectives, including whether the study describes the development or validation of the model or both. | Introduction |
| **Methods** | | | | |
| Source of data | 4a | D;V | Describe the study design or source of data (e.g., randomized trial, cohort, or registry data), separately for the development and validation data sets, if applicable. | Methods, Study design |
| 4b | D;V | Specify the key study dates, including start of accrual; end of accrual; and, if applicable, end of follow-up. | Methods,  Study Design |
| Participants | 5a | D;V | Specify key elements of the study setting (e.g., primary care, secondary care, general population) including number and location of centres. | Methods,  Study Design |
| 5b | D;V | Describe eligibility criteria for participants. | Methods, Study Design |
| 5c | D;V | Give details of treatments received, if relevant. | Not applicable |
| Outcome | 6a | D;V | Clearly define the outcome that is predicted by the prediction model, including how and when assessed. | Methods,  Data collection |
| 6b | D;V | Report any actions to blind assessment of the outcome to be predicted. | Not applicable |
| Predictors | 7a | D;V | Clearly define all predictors used in developing the multivariable prediction model, including how and when they were measured. | Methods,  Data collection |
| 7b | D;V | Report any actions to blind assessment of predictors for the outcome and other predictors. | Not applicable |
| Sample size | 8 | D;V | Explain how the study size was arrived at. | Not applicable |
| Missing data | 9 | D;V | Describe how missing data were handled (e.g., complete-case analysis, single imputation, multiple imputation) with details of any imputation method. | Methods,  Data processing |
| Statistical analysis methods | 10a | D | Describe how predictors were handled in the analyses. | Methods,  Statistical analysis |
| 10b | D | Specify type of model, all model-building procedures (including any predictor selection), and method for internal validation. | Methods, Model construction |
| 10c | V | For validation, describe how the predictions were calculated. | Methods, Model evaluation |
| 10d | D;V | Specify all measures used to assess model performance and, if relevant, to compare multiple models. | Methods,  Model evaluation |
| 10e | V | Describe any model updating (e.g., recalibration) arising from the validation, if done. | Not applicable |
| Risk groups | 11 | D;V | Provide details on how risk groups were created, if done. | Not applicable |
| Development vs. validation | 12 | V | For validation, identify any differences from the development data in setting, eligibility criteria, outcome, and predictors. | Methods,  Model evaluation |
| Results | | | | |
| Participants | 13a | D;V | Describe the flow of participants through the study, including the number of participants with and without the outcome and, if applicable, a summary of the follow-up time. A diagram may be helpful. | Results, Figure 1 |
| 13b | D;V | Describe the characteristics of the participants (basic demographics, clinical features, available predictors), including the number of participants with missing data for predictors and outcome. | Results, Table 2 |
| 13c | V | For validation, show a comparison with the development data of the distribution of important variables (demographics, predictors and outcome). | Results, Additional file |
| Model development | 14a | D | Specify the number of participants and outcome events in each analysis. | Results |
| 14b | D | If done, report the unadjusted association between each candidate predictor and outcome. | Not applicable |
| Model specification | 15a | D | Present the full prediction model to allow predictions for individuals (i.e., all regression coefficients, and model intercept or baseline survival at a given time point). | Results, Model explanation |
| 15b | D | Explain how to use the prediction model. | Results,  Additional file |
| Model performance | 16 | D;V | Report performance measures (with CIs) for the prediction model. | Results, Table 3 |
| Model-updating | 17 | V | If done, report the results from any model updating (i.e., model specification, model performance). | Not applicable |
| **Discussion** | | | | |
| Limitations | 18 | D;V | Discuss any limitations of the study (such as nonrepresentative sample, few events per predictor, missing data). | Discussion  Limitations |
| Interpretation | 19a | V | For validation, discuss the results with reference to performance in the development data, and any other validation data. | Discussion |
| 19b | D;V | Give an overall interpretation of the results, considering objectives, limitations, results from similar studies, and other relevant evidence. | Discussion,  Conclusion |
| Implications | 20 | D;V | Discuss the potential clinical use of the model and implications for future research. | Conclusion |
| **Other information** | | | | |
| Additional information | 21 | D;V | Provide information about the availability of Additional resources, such as study protocol, Web calculator, and data sets. | Additional file |
| Funding | 22 | D;V | Give the source of funding and the role of the funders for the present study. | Declarations  Funding |

*Items relevant only to the development of a prediction model are denoted by D, items relating solely to a validation of a prediction model are denoted by V, and items relating to both are denoted D;V. We recommend using the TRIPOD Checklist in conjunction with the TRIPOD Explanation and Elaboration document.

Table S2 Comparisons of Baseline Characteristics and Outcome Between with Thrombocytopenia and No Thrombocytopenia in Dongyang data

| Variables | 0 (n = 291) | 1 (n = 195) | p |
| --- | --- | --- | --- |
| Age (years), Mean（SD） | 57.9 ± 11.7 | 63.7 ± 9.7 | < 0.001 |
| Sex, Male (%), n (%) | 134 (46) | 83 (42.6) | 0.507 |
| Surgery duration (hours)， Mean（SD） | 5.6 ± 1.3 | 6.1 ± 1.3 | < 0.001 |
| SOFA score, Median (Q1,Q3) | 6 (5, 7) | 7 (6, 8) | < 0.001 |
| Hormone administration day 1 (%), n (%) | 169 (58.1) | 112 (57.4) | 0.963 |
| Antiplatelet therapy day 1 (%), n (%) | 12 (4.1) | 14 (7.2) | 0.207 |
| CRRT (%), n (%) | 2 (0.7) | 2 (1) | 1 |
| Hypertension (%), n (%) | 72 (24.7) | 53 (27.2) | 0.619 |
| Diabetes (%), n (%) | 18 (6.2) | 19 (9.7) | 0.202 |
| Platelet count on first ICU day (×109/L), Mean（SD） | 126.5 ± 38.5 | 90.2 ± 25.1 | < 0.001 |
| Creatinine on first ICU day (μmol/L), Mean（SD） | 74.7 ± 22.7 | 82.1 ± 24.3 | < 0.001 |
| Prothrombin time (seconds), Median (Q1,Q3) | 14.6 (14.1, 15.45) | 15.2 (14.4, 16.35) | < 0.001 |
| APTT (seconds), Mean（SD） | 37.7 ± 5 | 40.1 ± 5.9 | < 0.001 |
| INR, Mean（SD） | 1.2 ± 0.1 | 1.2 ± 0.1 | < 0.001 |
| Maximum blood glucose (mmol/L), Mean（SD） | 11.2 ± 2.7 | 12.6 ± 3.3 | < 0.001 |
| Minimum blood glucose (mmol/L), Mean（SD） | 7.5 ± 1.5 | 7.4 ± 1.7 | 0.457 |
| Platelet count on first ICU day, repetition 1 (×109/L), Mean（SD） | 126.5 ± 38.5 | 90.2 ± 25.1 | < 0.001 |
| Lactate (mmol/L), Mean（SD） | 3.6 ± 2.2 | 4.8 ± 2.9 | < 0.001 |
| White blood cell count (×109/L), Mean（SD） | 14 ± 4.3 | 13.5 ± 4.8 | 0.211 |
| Calcium (mmol/L), Mean（SD） | 2.1 ± 0.2 | 2.1 ± 0.2 | 0.012 |
| Maximum systolic blood pressure (mmHg), Mean（SD） | 144.8 ± 16.1 | 144.5 ± 16.8 | 0.817 |
| Minimum systolic blood pressure (mmHg), Mean（SD） | 87.6 ± 8.5 | 83.5 ± 8.8 | < 0.001 |
| Maximum body temperature (°C), Mean（SD） | 38.1 ± 0.5 | 38.1 ± 0.5 | 0.944 |
| Minimum body temperature (°C), Mean（SD） | 35.7 ± 0.7 | 35.8 ± 0.7 | 0.507 |
| Hospital mortality (%), n (%) | 3 (1) | 4 (2.1) | 0.446 |
| ICU length of stay (days), Median (Q1,Q3) | 3.78 (2.82, 4.79) | 4.71 (3.78, 5.74) | < 0.001 |
| Hospital auxiliary unit length of stay (days), Median (Q1,Q3) | 0.85 (0.78, 0.98) | 0.82 (0.75, 0.95) | 0.033 |
| Length of hospital stay (days), Median (Q1,Q3) | 26 (21, 34) | 28 (21, 34) | 0.299 |
| Hospital cost (USD), Median (Q1,Q3) | 89.31 (73.57, 118.38) | 125.4 (105.09, 150.32) | < 0.001 |

Abbreviations:CRRT: Continuous Renal Replacement Therapy；SOFA: Sequential Organ Failure Assessment；APTT: Activated Partial Thromboplastin Time；INR: International Normalized Ratio；WBC: White Blood Cell；ICU: Intensive Care Unit；

Fig S1 lasso1


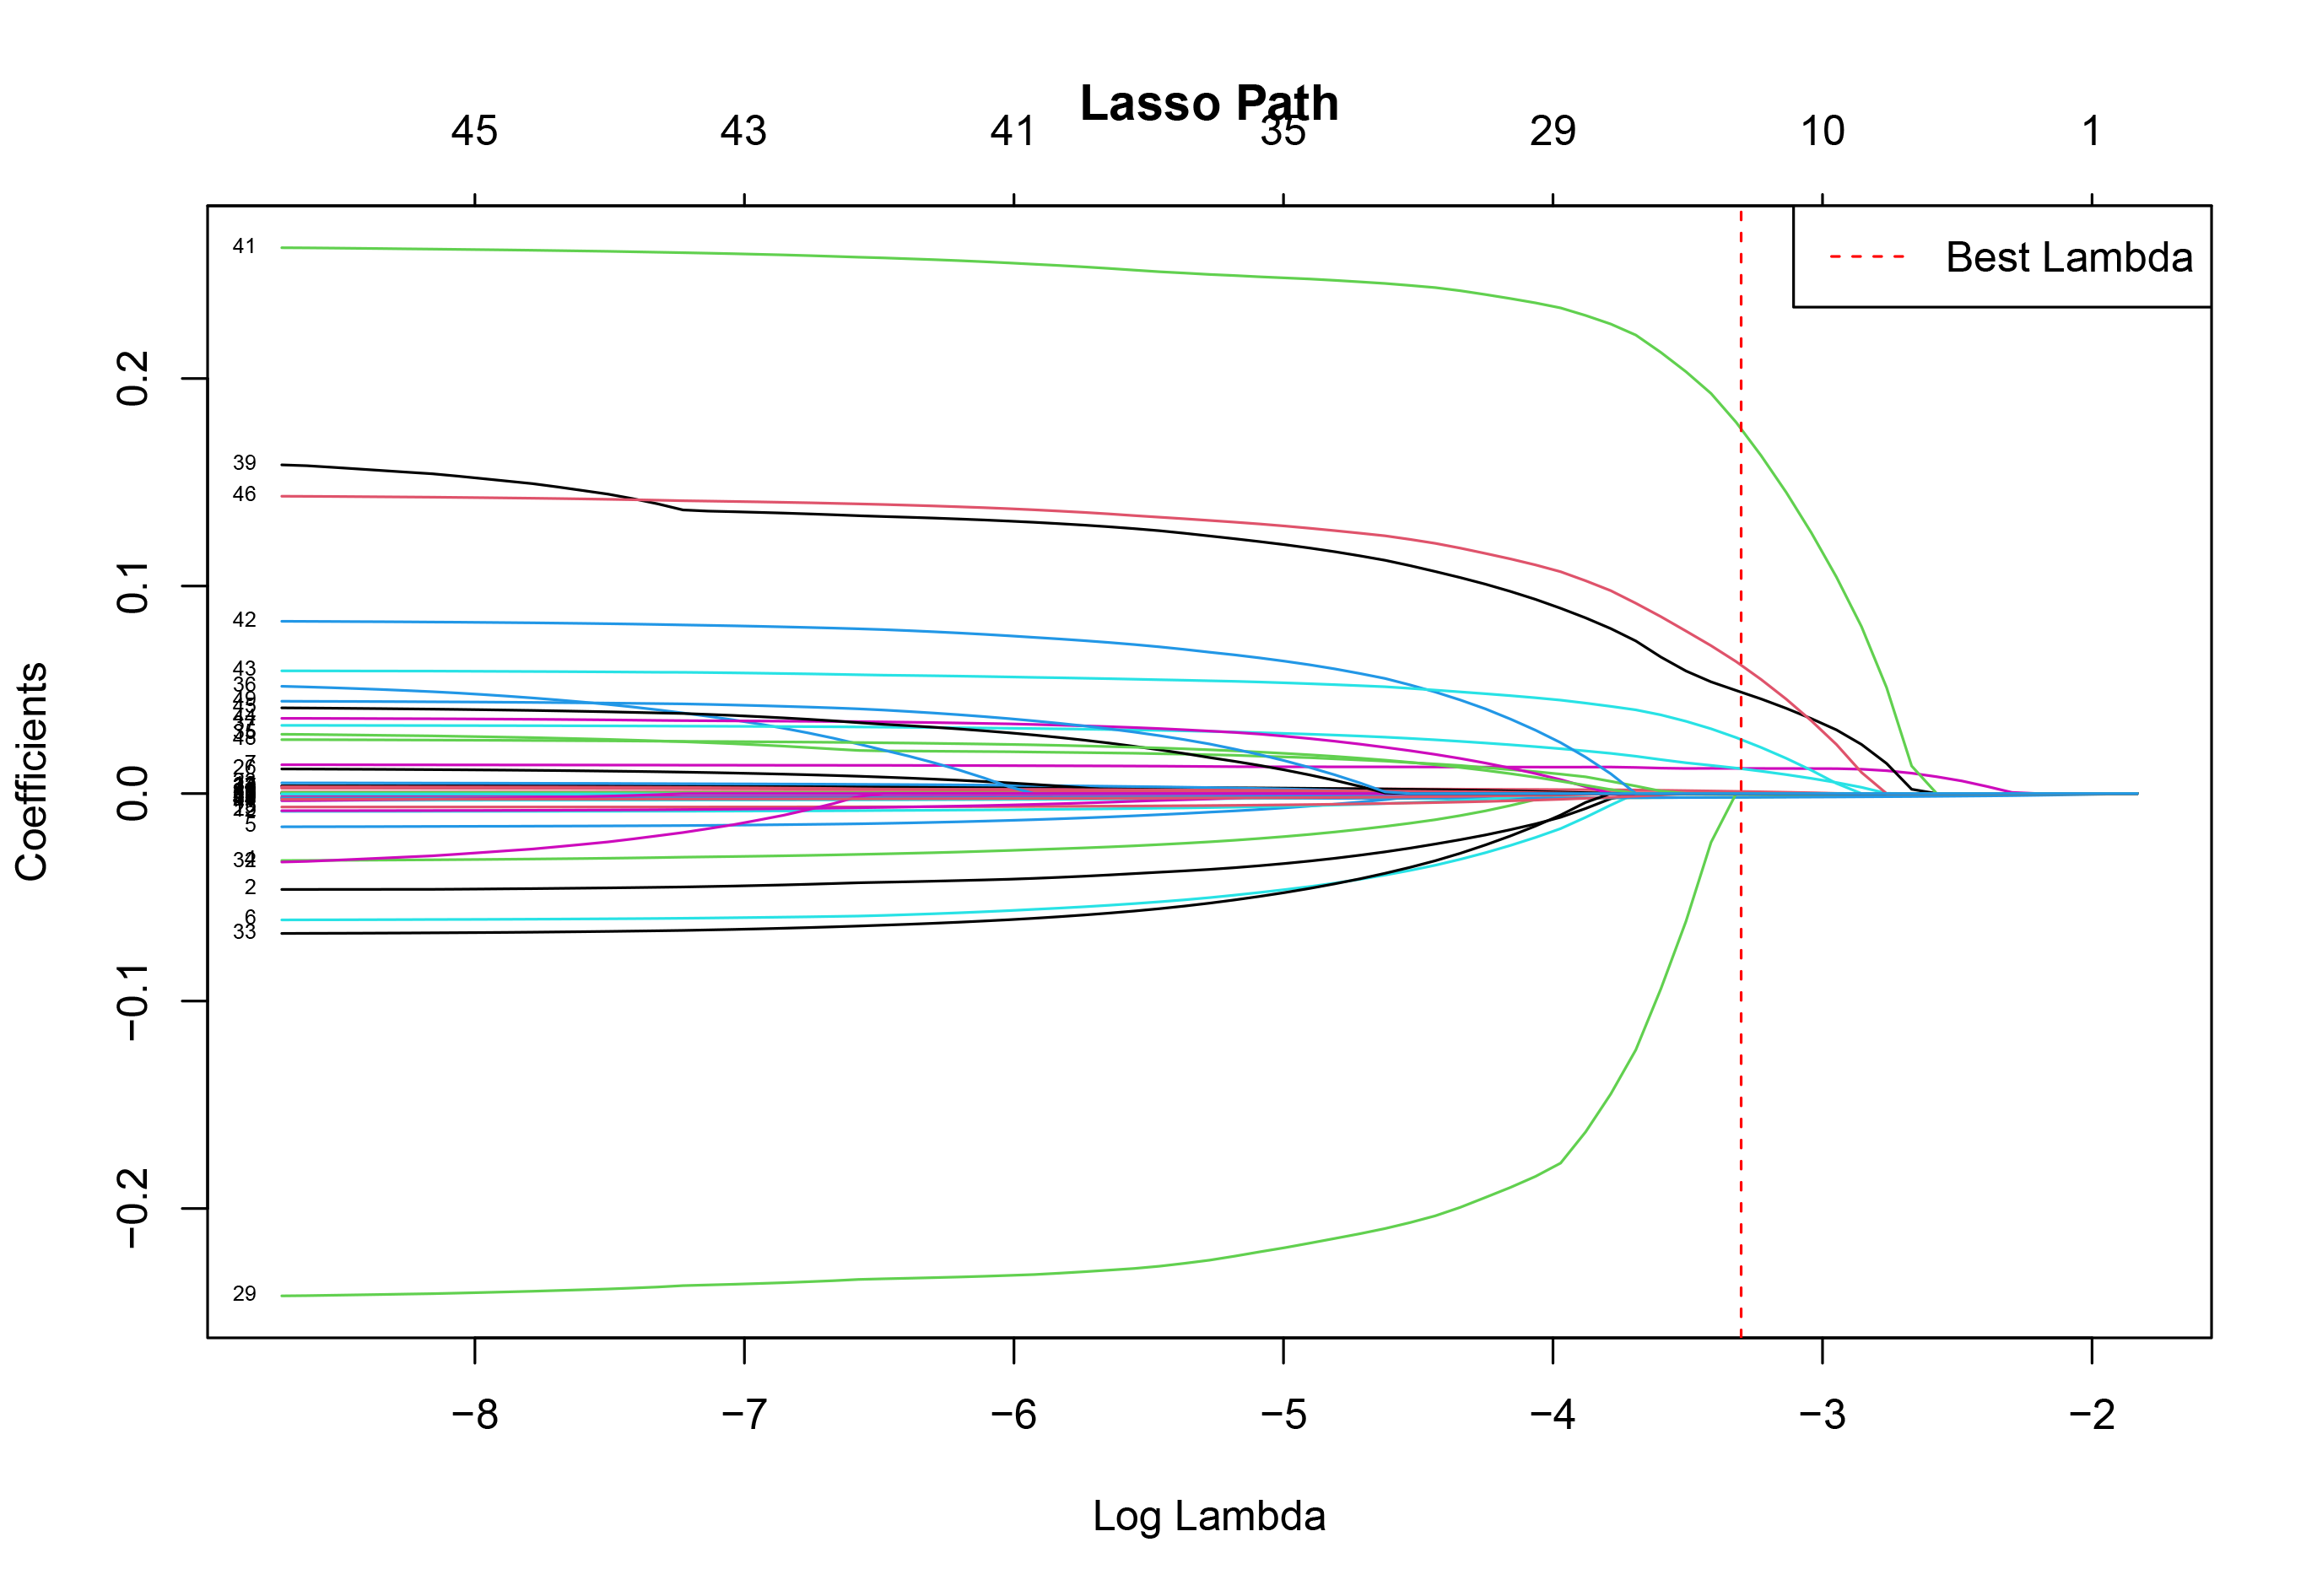


Fig S2 lasso2


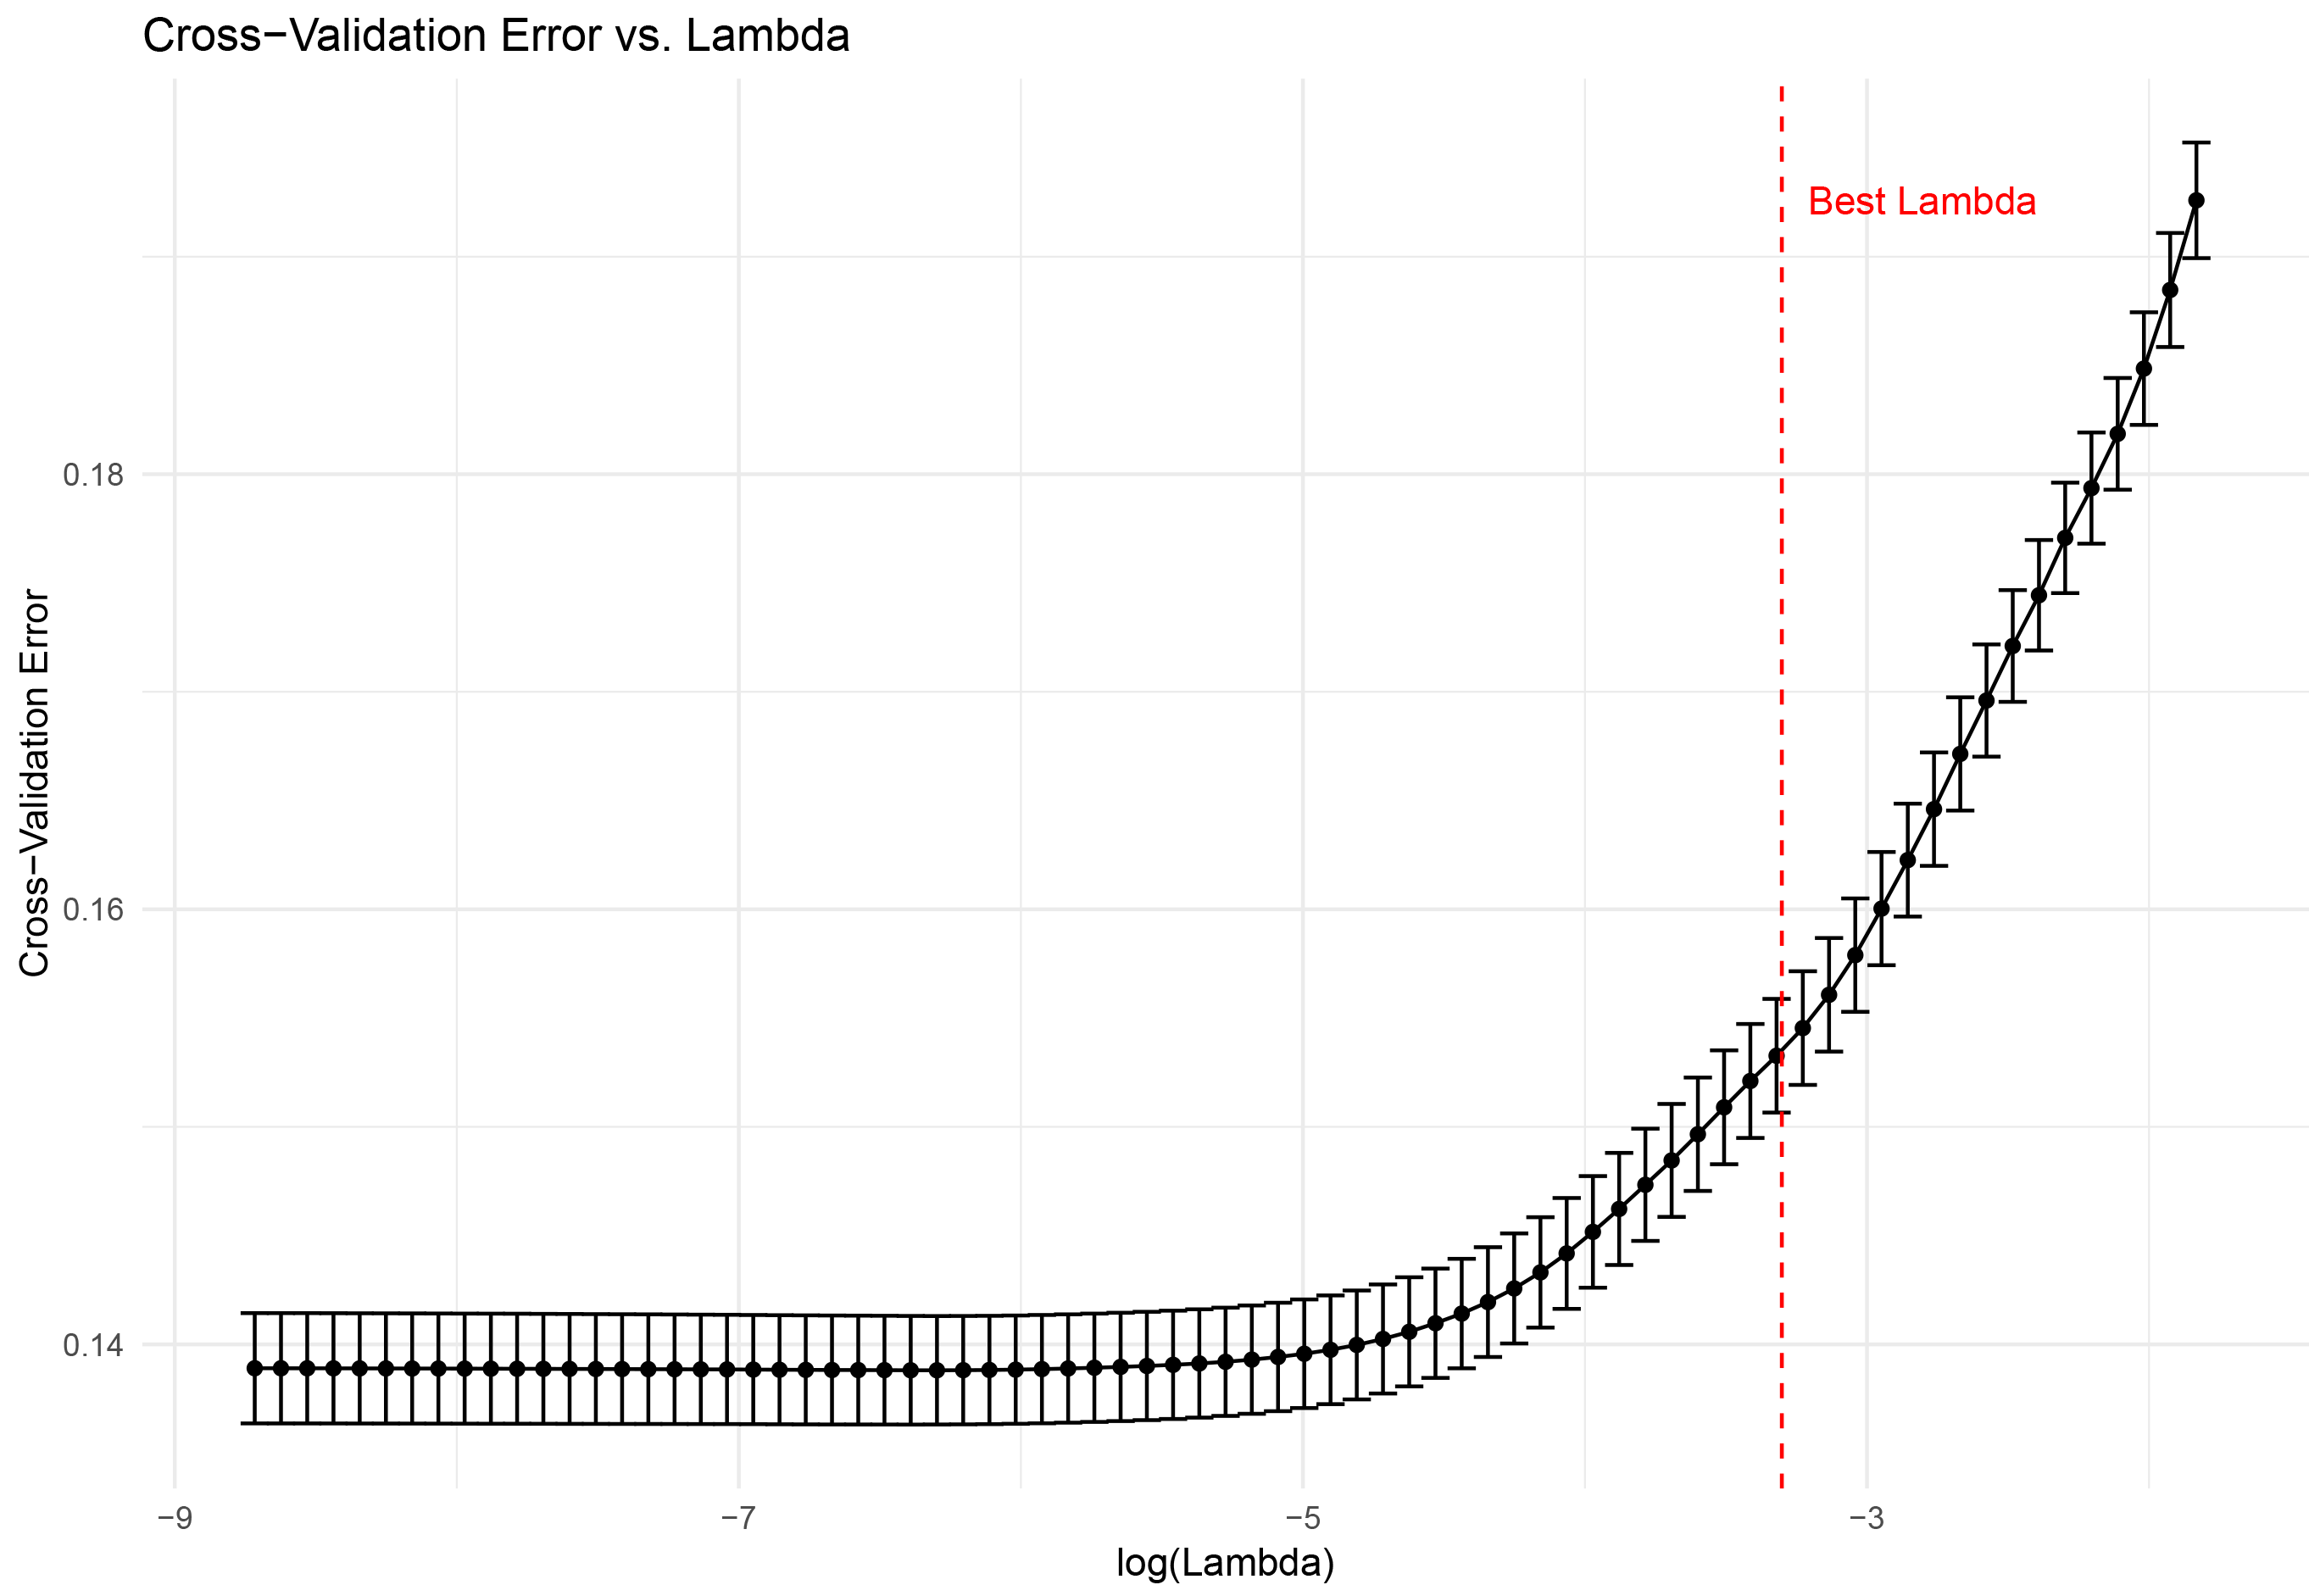


Fig S3 调参c50


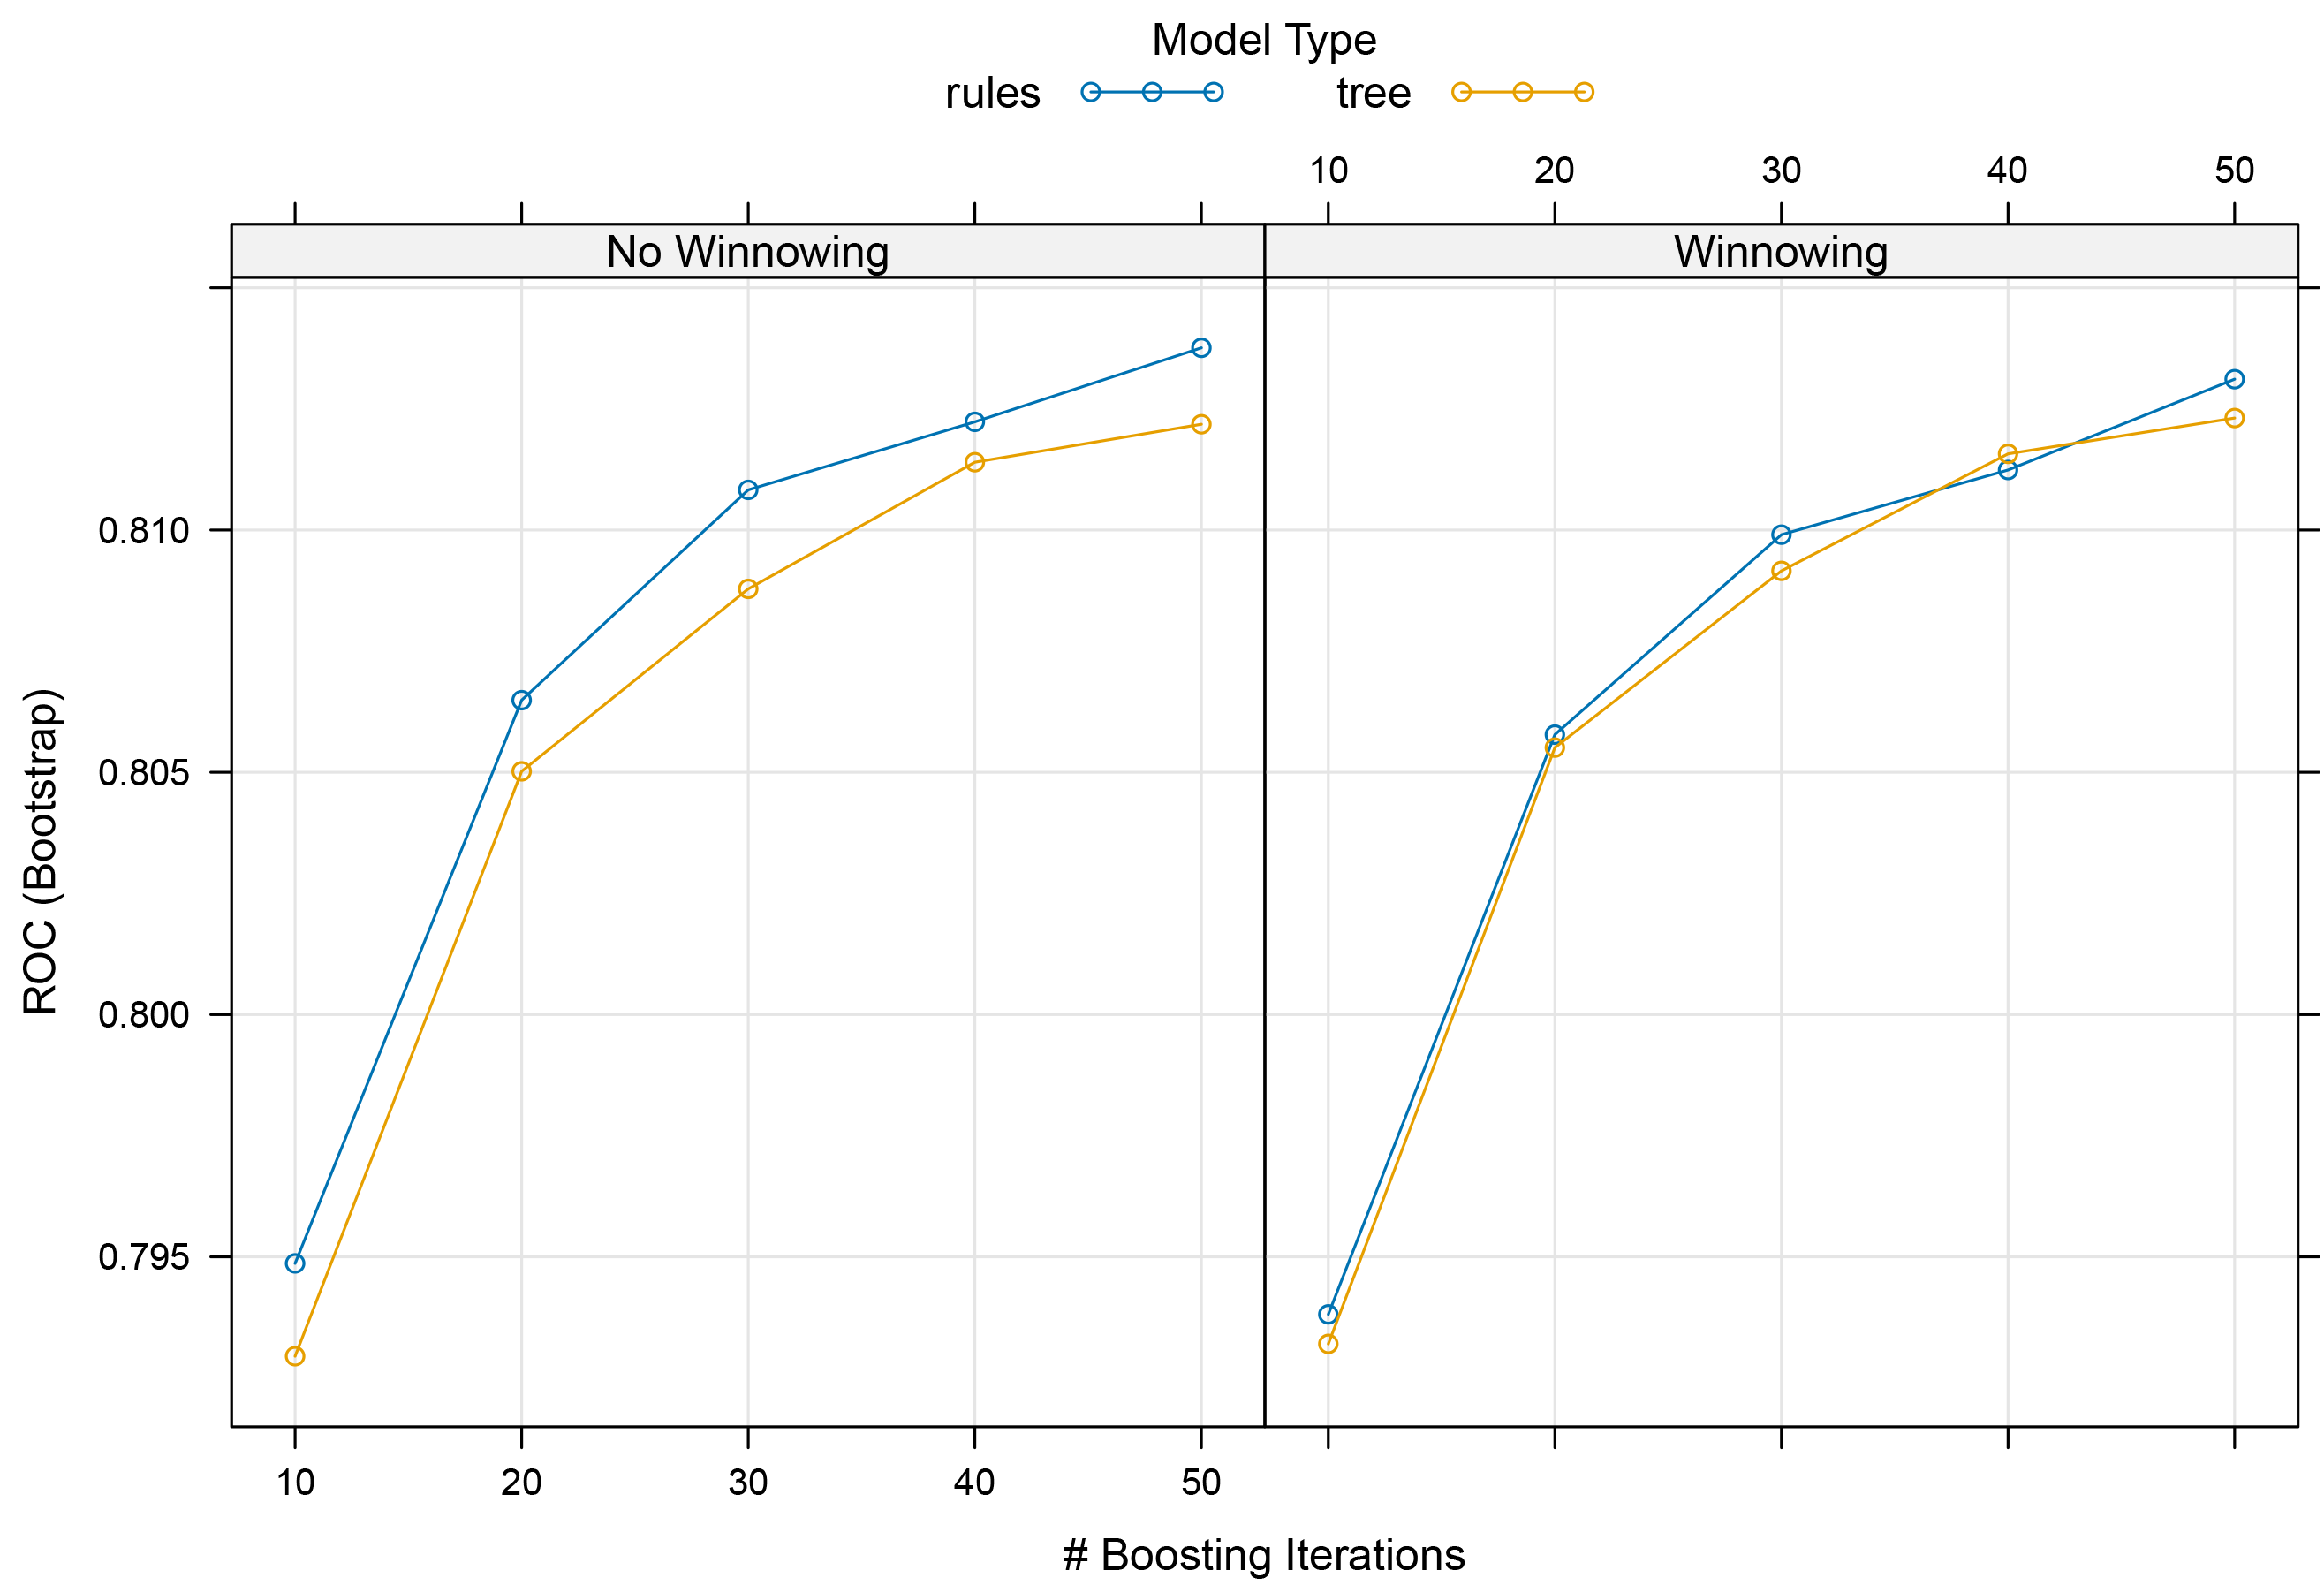


Fig S4 调参SVM


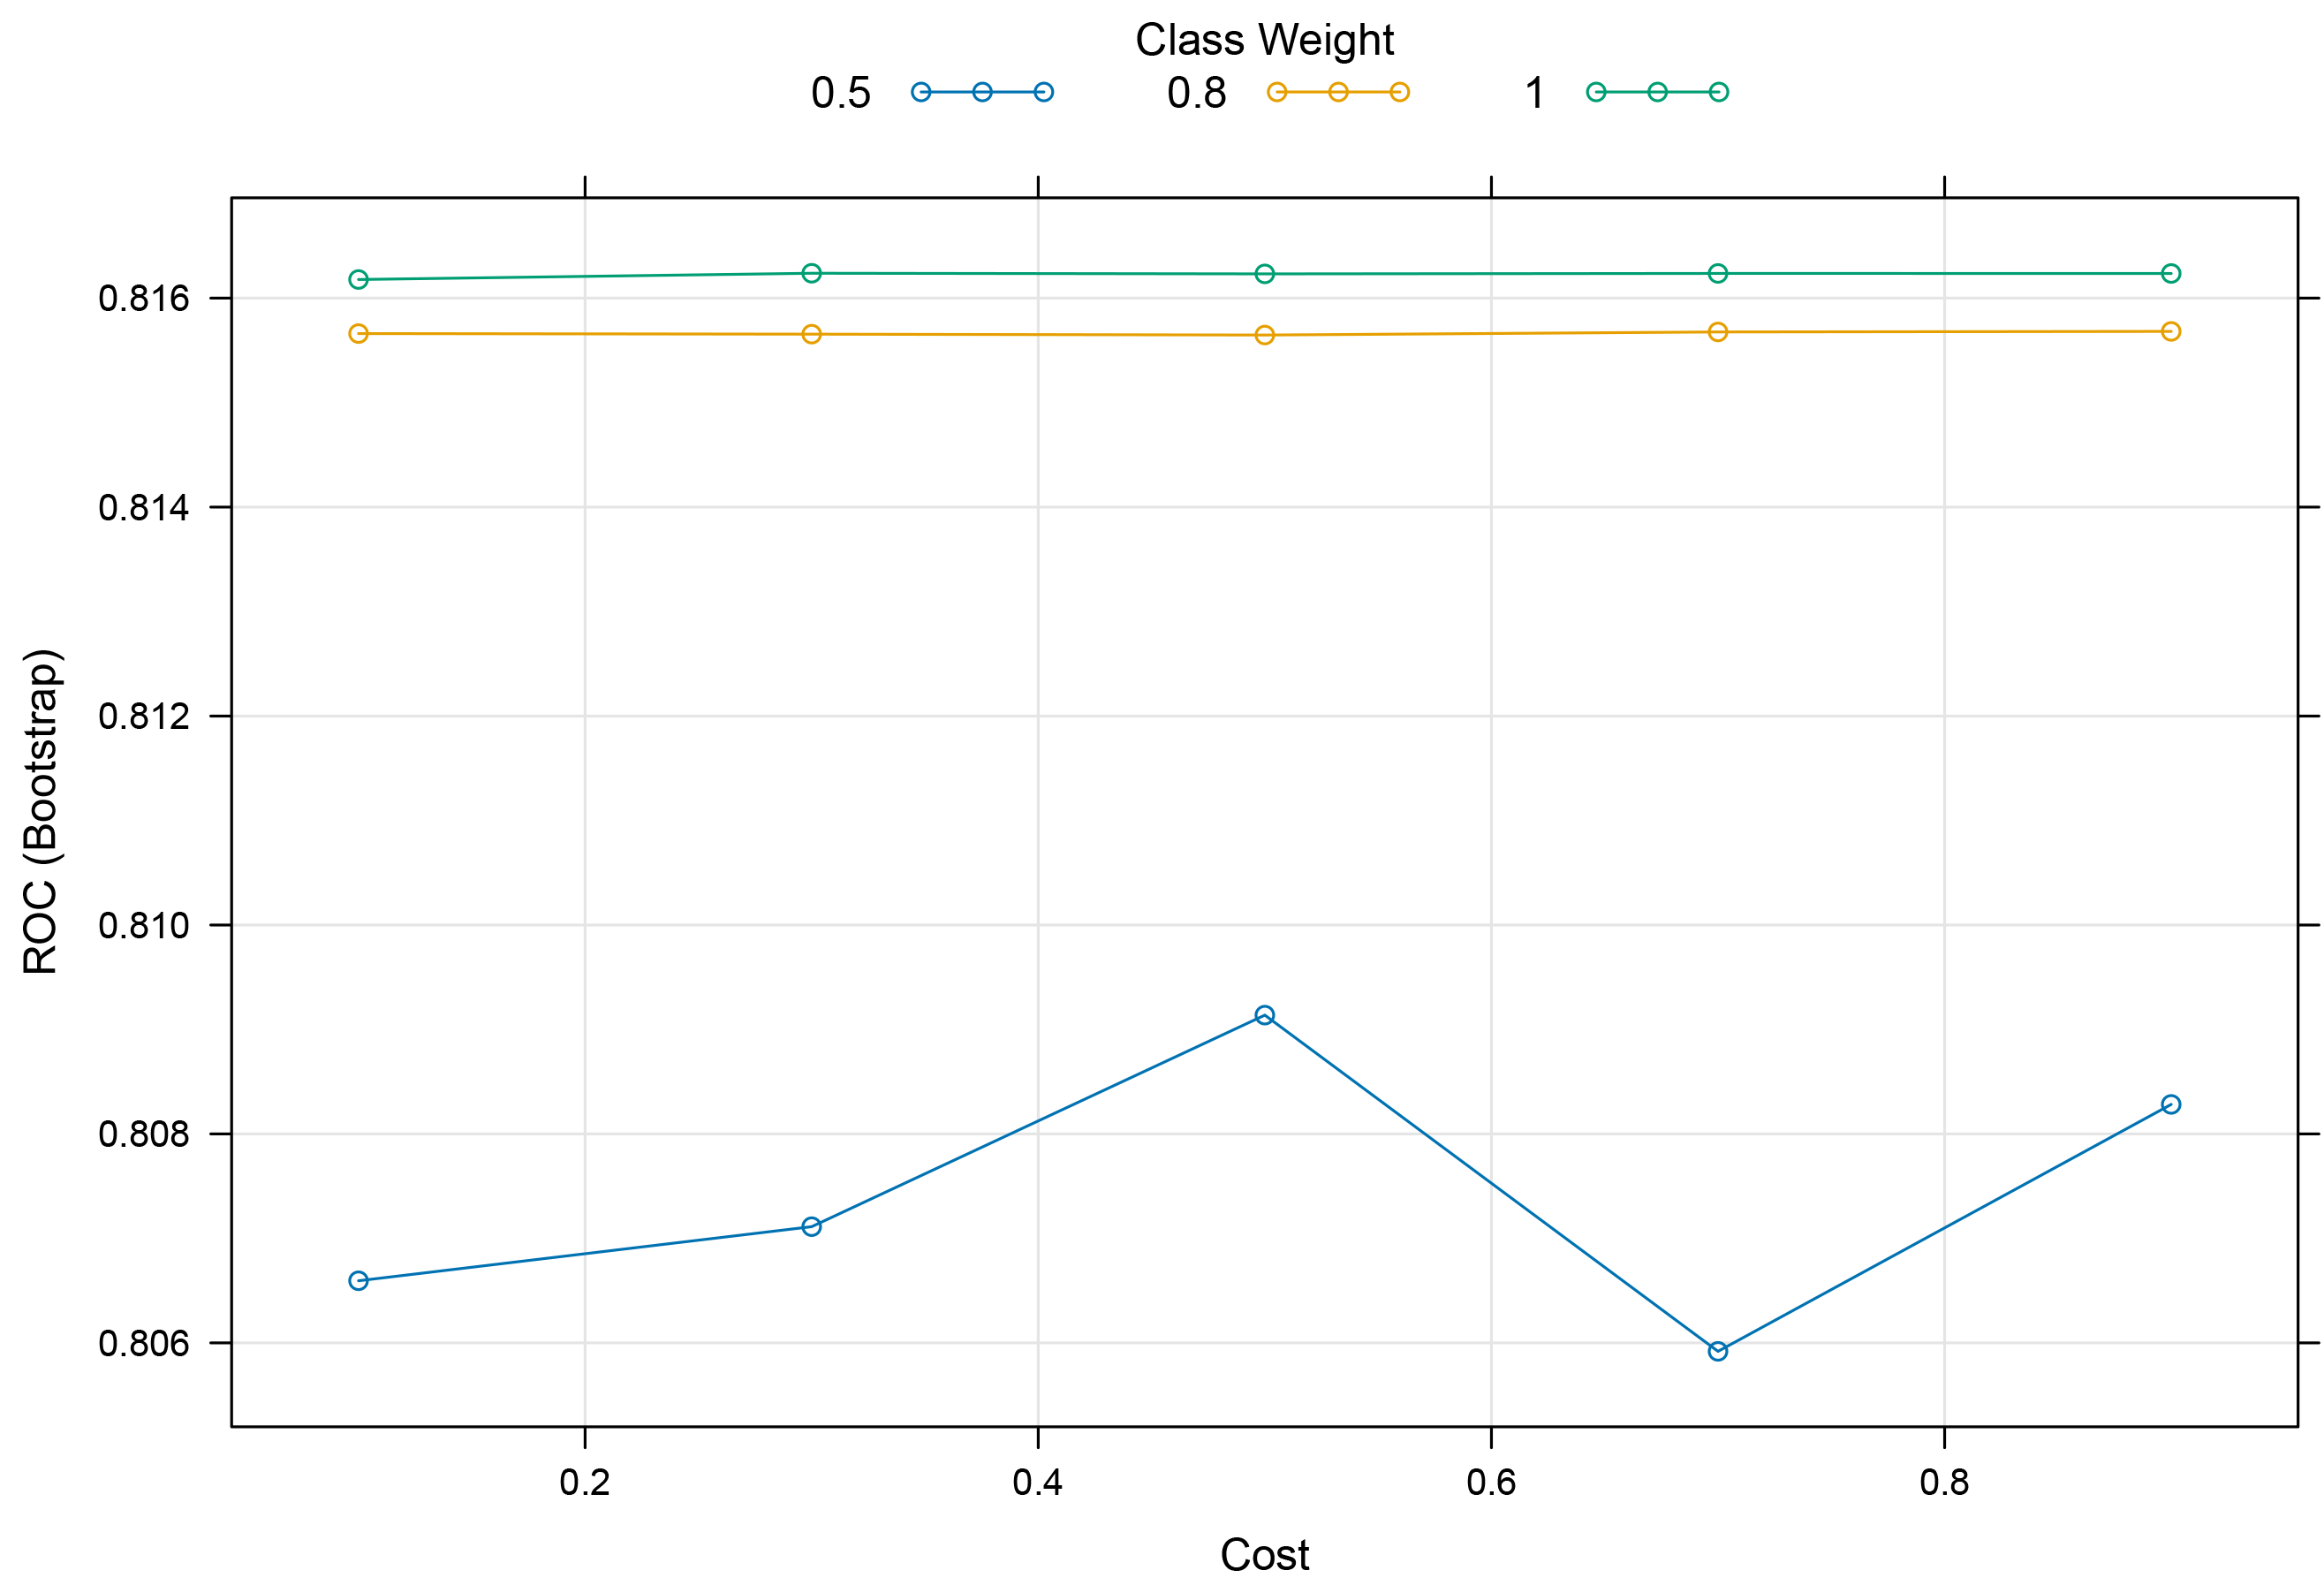


Fig S5 调参XGboost


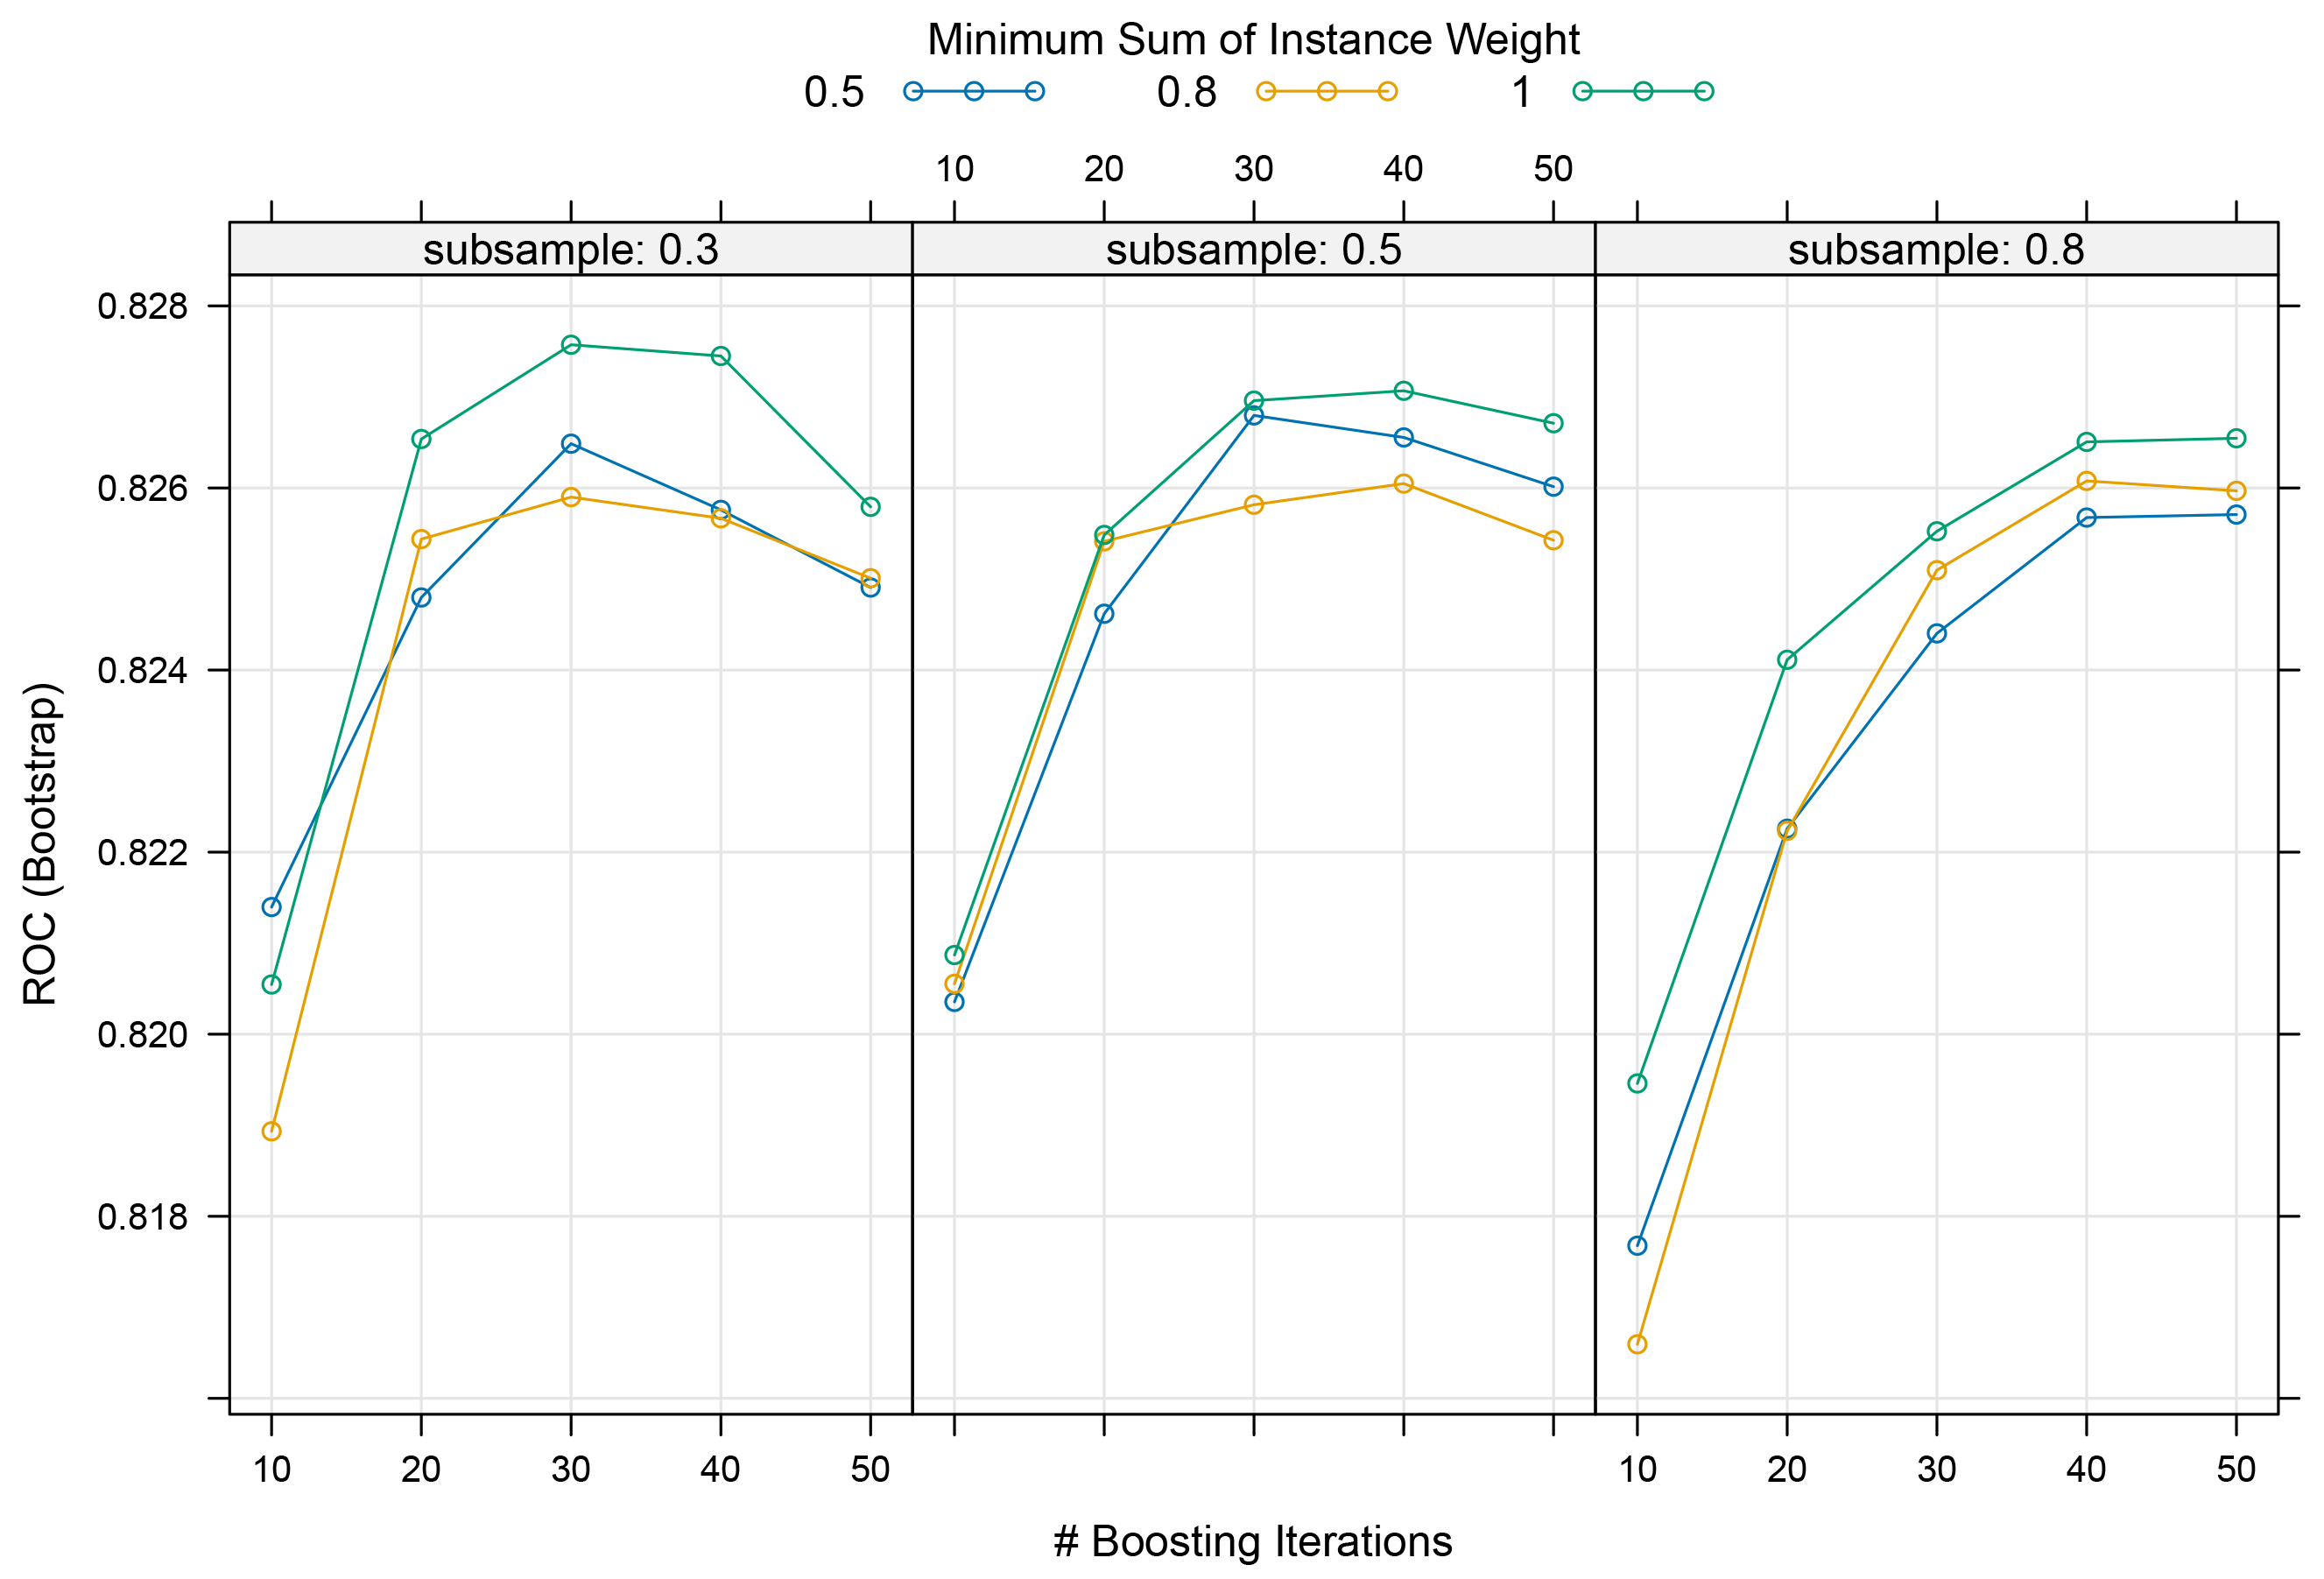

Supplement: Supplementary file 1 [file ff68d81b58d231991c5f3860.docx]
